# Supplementary material for: Characterization of the Escherichia coli σS core regulon by Chromatin Immunoprecipitation-sequencing (ChIP-seq) analysis
Source: PubMed Central journal article supplement (PMC4447067; doi:10.1038/srep10469), 2015-05-28
Supplement: srep10469-s1.pdf [file srep10469-s1.pdf]

## Supplementary Materials

### Characterization of the *Escherichia coli* $\sigma^S$ core regulon by Chromatin Immunoprecipitation-sequencing (ChIP-seq) analysis.

Clelia Peano<sup>1+</sup>, Johannes Wolf<sup>2+</sup>, Julien Demol<sup>3,4</sup>, Elio Rossi<sup>5</sup>, Luca Petiti<sup>1</sup>, Gianluca De Bellis<sup>1</sup>, Johannes Geiselmann<sup>3,4</sup>, Thomas Egli<sup>2</sup>, Stephan Lacour<sup>3,4\*</sup> and Paolo Landini<sup>5\*</sup>

<sup>1</sup> Institute of Biomedical Technologies, National Research Council (ITB-CNR), Segrate (MI), Italy

<sup>2</sup> EAWAG, Swiss Federal Institute for Environmental Science and Technology, Dübendorf, Switzerland

<sup>3</sup> Lab. Adaptation et Pathogénie des Micro-organismes (LAPM), Univ. Grenoble Alpes, F-38000 Grenoble, France.

<sup>4</sup> UMR 5163, Centre National de Recherche Scientifique (CNRS), Grenoble, France

<sup>5</sup> Department of Biosciences, Università degli Studi di Milano, Milan, Italy

\* To whom correspondence should be addressed:

\*Stephan Lacour

Tel. +33 4 76 63 74 89

Fax. +33 4 76 63 74 97

[stephan.lacour@ujf-grenoble.fr](mailto:stephan.lacour@ujf-grenoble.fr)

\*Paolo Landini

Tel. +39-02-50315028

Fax +39-02-50315044

[paolo.landini@unimi.it](mailto:paolo.landini@unimi.it)

<sup>+</sup> C.P. and J.W. contributed equally to this work

**Table S1.** Sequence and use of DNA primers used in the present study.

| Primer name | Sequence                                                                                        | Utilization                                      |
|-------------|-------------------------------------------------------------------------------------------------|--------------------------------------------------|
| rpoS_OF     | TTTGCTTGAATGTTCCGTCAAGGGATCACGGGT-<br>AGGAGCCACCTTTCAGAAGAACTCGTCAAGAAGG                        | Knock out of <i>rpoS</i>                         |
| rpoS_OR     | AAAGGCCAGCCTCGCTTGAGACTGGCCTTTCTG-<br>ACAGATGCTTACCGTCATCGCCATTAATTCCTG                         | Knock out of <i>rpoS</i>                         |
| rpoS_IF     | TTTGCTTGAATGTTCCGTCAAGGGATCACGGGT-<br>AGGAGCCACCTTATGAGTCAGAATACGCTGAAA                         | Knock in<br>replacement of <i>rpoS</i>           |
| rpoS_IR     | AAAGGCCAGCCTCGCTTGAGACTGGCCTTTCTG-<br>ACAGATGCTTACTTAGTGATGGTGATGGTGATGC-<br>TCGCGGAACAGCGCTTCG | Knock in<br>replacement of <i>rpoS</i>           |
| rpoS_F      | AACCAGTTCAACACGCTTGC                                                                            | PCR verification of<br><i>rpoS</i> locus         |
| rpoS_R      | GTGTTAACGACCATTCTCGG                                                                            | PCR verification of<br><i>rpoS</i> locus         |
| dps_F       | GCCAGAATAGCGGAACACAT                                                                            | qRT-PCR (ChIP<br>enrichment)                     |
| dps_R       | GCGGGTATAAAGCAGATTGG                                                                            | qRT-PCR (ChIP<br>enrichment)                     |
| rpoB_F      | GCGATGGCGTAGAAAAAGAC                                                                            | qRT-PCR (ChIP<br>enrichment)                     |
| rpoB_R      | CTACCAGCACAGCACGGATA                                                                            | qRT-PCR (ChIP<br>enrichment)                     |
| yeeJ_F      | GACGAACGAACAGGGTAAGG                                                                            | qRT-PCR (ChIP<br>enrichment)                     |
| yeeJ_R      | TTGATGTGCTAAGCGTGGAG                                                                            | qRT-PCR (ChIP<br>enrichment)                     |
| dps_F       | GGATGGCTTCCGCACCG                                                                               | qRT-PCR                                          |
| dps_R       | CTTGAGTGGTCCCCAGAG                                                                              | qRT-PCR                                          |
| ycgB_F      | TCCGAACCACAAGAAAACCT                                                                            | qRT-PCR                                          |
| ycgB_R      | GGCTCACCTTACGCACAATAC                                                                           | qRT-PCR                                          |
| lpp_F       | AGCTGAGCAACGACGTGAAC                                                                            | qRT-PCR                                          |
| lpp_R       | GTAGCCATGTTGTCCAGACG                                                                            | qRT-PCR                                          |
| ssrA_F      | ATCAAGAGAGGTCAAACCCAAA                                                                          | qRT-PCR                                          |
| ssrA_R      | GGACGGACACGCCACTAAC                                                                             | qRT-PCR                                          |
| uxaB_F      | ATTCAGGGACCGAAATCCTT                                                                            | qRT-PCR                                          |
| uxaB_R      | ATTGCCACTTTGCGTTCTTT                                                                            | qRT-PCR                                          |
| ybiI_F      | CCGTCAACGAACAGATCAAC                                                                            | qRT-PCR                                          |
| ybiI_R      | CCGCACTCTTCACATTCATC                                                                            | qRT-PCR                                          |
| ydbK_F      | AAAGTTGGCGTGCTGAAAGT                                                                            | qRT-PCR                                          |
| ydbK_R      | GGGTTCTTTGGTTCTGTCCA                                                                            | qRT-PCR                                          |
| ygjR_F      | CTGTTTACCTCGCTGGAAGC                                                                            | qRT-PCR                                          |
| ygjR_R      | CGGTTTCTCGCAAATCACAT                                                                            | qRT-PCR                                          |
| 16S_F       | TGTCGTCAGCTCGTGTCGTGA                                                                           | qRT-PCR                                          |
| 16S_R       | ATCCCCACCTTCTCCGGT                                                                              | qRT-PCR                                          |
| ybiI_fwd    | TATTCAGTCGCTGAAAAGC                                                                             | <i>In vitro</i> experiments<br>with labelled DNA |

|              |                                                    |                                                                     |
|--------------|----------------------------------------------------|---------------------------------------------------------------------|
| ybiI_rev     | AATTGTACTGTTGATCTGTTCCG                            | <i>In vitro</i> experiments with labelled DNA                       |
| ydbK_fwd     | CGCATTTTTACTTTTTTATGGC                             | <i>In vitro</i> experiments with labelled DNA                       |
| ydbK_rev     | GATGGCGATAACTTCACTGG                               | <i>In vitro</i> experiments with labelled DNA                       |
| omrA_Fwd     | TATCTCGAGGCCGGTCATCAATCTGTAAC                      | Construction of the <i>omrA::GFP</i> transcriptional fusion         |
| omrA_rev     | TATGAATTCCTCTGGGATCTTGATTGTG                       | Construction of the <i>omrA::GFP</i> transcriptional fusion         |
| omrB_Fwd     | TATCTCGAGTCAGTGTTACGGAAAACGCC                      | Construction of the <i>omrB::GFP</i> transcriptional fusion         |
| omrB_rev     | TATGAATTCCTCTGGGATCACCCTTTA                        | Construction of the <i>omrB::GFP</i> transcriptional fusion         |
| omrA_mut_rev | TATGAATTCCTCTGGGATCTTGATTGT <b><u>AG</u></b> TCTGC | Construction of the mutant <i>omrA::GFP</i> transcriptional fusion* |
| [Btn]-omrA   | TTGGTGCAAGAGACAGGGTACGAAG                          | Northern blot hybridization**                                       |
| [Btn]-sibC   | CATCATACTGATTGTACTGTTACTC                          | Northern blot hybridization**                                       |
| [Btn]-ibsC   | GAGTAACAGTACAATCAGTATGATG                          | Northern blot hybridization**                                       |
| [Btn]-ryeA   | AGAGCCATTTCCCTGGACCGAATAC                          | Northern blot hybridization**                                       |
| [Btn]-ryeB   | CCTTGCCCTTTAAGAATAGATGACG                          | Northern blot hybridization**                                       |
| [Btn] 5S RNA | CGGCGCTACGGCGTTTCACTTCTG                           | Northern blot hybridization**                                       |

\*: the C>T substitution in the *omrA* -10 element (G>A in the reverse complement strand) is indicated in bold and underlined

\*\*:[Btn] indicates a 5'-biotinylation of the primer for utilization in northern blot experiments

**Table S2.** Location of intragenic peaks identified in ChIP-seq analysis.

| peak start | peak end | peak length | inside gene                 | chromosome strand | Gene function                                                      | Distance (bp) from closest gene start/ (gene) |
|------------|----------|-------------|-----------------------------|-------------------|--------------------------------------------------------------------|-----------------------------------------------|
| 130200     | 130349   | 149         | yacH                        | -                 | putative membrane protein                                          | 911 (yacH)                                    |
| 390600     | 390799   | 199         | yaiT                        | +                 | putative outer membrane protein                                    | 1125 (yaiT)                                   |
| 579200     | 579449   | 249         | ybcW                        | +                 | DLP2 prophage, predicted protein                                   | 97 (ybcW)                                     |
| 783131     | 783309   | 178         | zitB                        | +                 | zinc metal transporter                                             | 737 (zitB)                                    |
| 951282     | 951339   | 57          | pflB                        | -                 | pyruvate-formate lyase                                             | 979 (pflA)                                    |
| 1260424    | 1260539  | 115         | prs                         | -                 | ribose phosphate diphosphokinase                                   | 398 (dauA)                                    |
| 2190700    | 2190799  | 99          | yehE                        | -                 | predicted protein                                                  | 19 (yehE)                                     |
| 2480950    | 2481249  | 299         | emrK                        | -                 | Multidrug efflux transport system                                  | 112 (emrK)                                    |
| 2987500    | 2990649  | 3149        | yqeL/yqeK/ygeF<br>ygeG/ygeH | both              | predicted proteins, chaperone,<br>putative transcription regulator | N/A                                           |
| 2992550    | 2992699  | 149         | ygeK                        | -                 | transcription regulator, NarL<br>family                            | 226 (ygeK)                                    |
| 3362550    | 3362699  | 149         | yhcD                        | +                 | predicted outer membrane protein                                   | 510 (ychE1)                                   |
| 3471311    | 3471368  | 57          | fusA                        | -                 | translation elongation factor <i>G</i>                             | 168 (fusA)                                    |
| 3472750    | 3472899  | 149         | tusB                        | -                 | sulphur transfer protein complex                                   | 88 (tusB)                                     |
| 4366056    | 4366171  | 115         | aspA                        | -                 | aspartate-ammonia lyase                                            | 179 (aspA)                                    |
| 4533950    | 4534049  | 99          | yjhR<br>(pseudogene)        | +                 | Rac prophage tail fiber assembly<br>protein, induced in biofilms   | 912 (yjhR)                                    |

**Supplementary Table S3. Sequence of experimentally determined -10 promoter regions lying within ChIP-seq peaks.**

| Promoter name                                  | TSS location (coordinates) | Promoter sequence (-20 to +1 region) |
|------------------------------------------------|----------------------------|--------------------------------------|
| <b><math>\sigma^S</math>-dependent genes</b>   |                            |                                      |
| ansP (P1)                                      | 1524035                    | GTTCATGG <u>CAACT</u> TATATGA        |
| ansP (P2)                                      | 1524044                    | TGAATAAAC <u>CATTG</u> TCATGG        |
| cpdB                                           | 4434652                    | AATTGTGG <u>CATTCT</u> CACTG         |
| csiE                                           | 2663423                    | TCCTTGAG <u>CAA</u> CTTTAGCT         |
| csrA                                           | 2817295                    | ATATCGG <u>CTAA</u> CTTAGGTT         |
| dps                                            | 848173                     | GCCGGT <u>GCTATA</u> CTTAATCT        |
| omrA                                           | 2974211                    | GTGCAGAC <u>CACA</u> ATCAAGAT        |
| osmB                                           | 1341393                    | TTCTTAG <u>CTATT</u> TATAGTTAT       |
| osmE                                           | 1820307                    | ATGTAT <u>TCCAGG</u> CTTATCTA        |
| rssA                                           | 1288329                    | ACATAGG <u>CTATA</u> CTCGACAG        |
| sibC                                           | 3054873                    | CTTTGAC <u>CTAAT</u> TTAGTGAG        |
| uspB                                           | 3637871                    | TGATCTC <u>CTACA</u> CTATCTAT        |
| ybiI                                           | 837707                     | GGATTAG <u>CTACA</u> CTTAACTG        |
| ycgB                                           | 1236508                    | CAGGTGTT <u>CTATG</u> CTTGAAA        |
| ychH                                           | 1257961                    | GTGTTG <u>CTATA</u> CTTTACAC         |
| ydbK                                           | 1438870                    | CCATTTG <u>CTAAA</u> ATTGAAAG        |
| ydcS                                           | 1509623                    | CGCCGGT <u>CTATG</u> GTTAAACA        |
| ydgA                                           | 1687818                    | TCTCTG <u>CTAAG</u> CTTATTAA         |
| yggE                                           | 3066148                    | AGAGGCG <u>CTAAG</u> CTTGCCTC        |
| yjdC                                           | 4361353                    | CCGTGAAC <u>GACA</u> CTTGCAGT        |
| ytfJ                                           | 4437309                    | CCAAGTGG <u>TCGG</u> ATCACCTG        |
| <b><math>\sigma^S</math>-independent genes</b> |                            |                                      |
| alaE                                           | 2796688                    | CAAGATTATATATTAGCCAT                 |
| lpp                                            | 1755407                    | ACTTTGTGTAATACTTGTA                  |
| lpxC                                           | 106530                     | ATGTATAG <u>TACA</u> CTTCGGTT        |

|      |         |                                |
|------|---------|--------------------------------|
| sdaA | 1894833 | AATCATCG <b>CAATATT</b> AGTTA  |
| ssrA | 2753608 | AAATCTGGT <b>TACTT</b> ACCTT   |
| uxaB | 1608744 | AAGTTTGCT <b>AACCT</b> GTCGTA  |
| ygjR | 3235304 | AGGCGTGCT <b>TACATT</b> GACGAC |
| yobF | 1905641 | GTATGTGATA <b>ACAGATT</b> TCG  |
| ytfJ | 4437309 | CCAAGTGG <b>TCGGAT</b> CACCTG  |

**Supplementary Table S4.** Sequence of experimentally determined -35 promoter regions lying within ChIP-seq peaks

| Promoter name                                  | TSS location (coordinates) | Promoter sequence (-35 region) |
|------------------------------------------------|----------------------------|--------------------------------|
| <b><math>\sigma^S</math>-dependent genes</b>   |                            |                                |
| ansP (P1)                                      | 1524035                    | GGATGAATAA                     |
| ansP (P2)                                      | 1524044                    | AACTATCATC                     |
| cpdB                                           | 4434652                    | CATTTTCAAA                     |
| csiE                                           | 2663423                    | CATTCCTTTC                     |
| csrA                                           | 2817295                    | GTCAGGTTGA                     |
| dps                                            | 848173                     | AATAGCGGAA                     |
| omrA                                           | 2974211                    | CGCTGGCGAA                     |
| osmB                                           | 1341393                    | ATATTTCAAC                     |
| osmE                                           | 1820307                    | GCTTGAAAAA                     |
| rssA                                           | 1288329                    | GACACATAAG                     |
| sibC                                           | 3054873                    | GATTGACATC                     |
| uspB                                           | 3637871                    | TCTGGAAAAA                     |
| ybiI                                           | 837707                     | TGCCCCGAGTT                    |
| ycgB                                           | 1236508                    | CGGCGACGCG                     |
| yehH                                           | 1257961                    | CGCACATAAC                     |
| ydbK                                           | 1438870                    | CGAAAATGCA                     |
| ydcS                                           | 1509623                    | CGAAGGTGTG                     |
| ydgA                                           | 1687818                    | TACTGAAAAA                     |
| yggE                                           | 3066148                    | TGATGGAAAA                     |
| yjdC                                           | 4361353                    | TTTTGGCGGA                     |
| <b><math>\sigma^S</math>-independent genes</b> |                            |                                |
| alaE                                           |                            | AACTCTCAGA                     |
| lpp                                            | 1755407                    | TATTCTCAAC                     |
| lpxC                                           | 106530                     | GCTAAACTGG                     |

|      |         |            |
|------|---------|------------|
| sdaA | 1894833 | AAAACACTAC |
| ssrA | 2753608 | GCTGGTCATG |
| uxaB | 1608744 | GGTTCGGCGT |
| ygjR | 3235304 | CGTCGAAGAT |
| yobF | 1905641 | GCCTGGAACA |
| ytfJ | 4437309 | GATTAAACTC |



### Supplementary Figure-S1 (Landini)

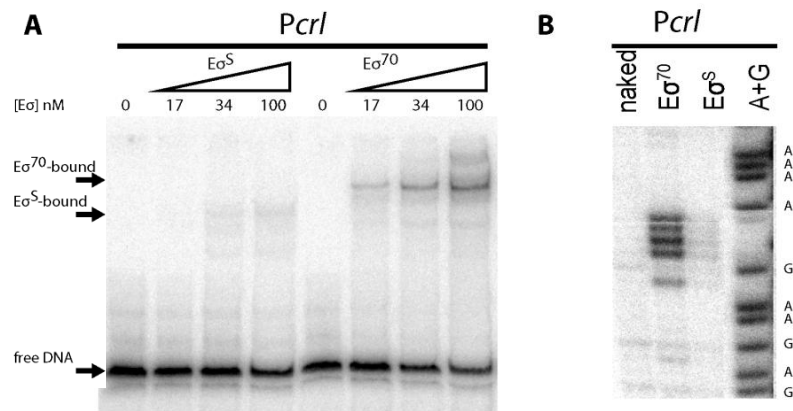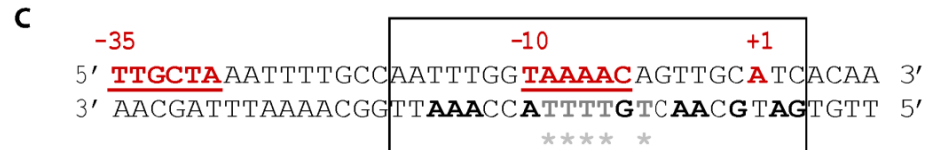

**Supplementary Figure-S1.  $E\sigma^{70}$  and  $E\sigma^S$  interaction with the *crl* promoter *in vitro*.** **A.** Gel retardation assays performed in K-glutamate buffer with heparin challenge. **B.**  $KMnO_4$  reactivity assays: both  $E\sigma^S$  and  $E\sigma^{70}$  forms of RNA polymerase were tested at 50 nM.; a G+A sequencing reaction of the *crl* promoter fragment (template strand) was used as molecular weight marker (residues marked in bold in panel C). **C.** Sequence of *crl* promoter. Promoter elements are indicated in red and the -35 and -10 sequences are underlined.

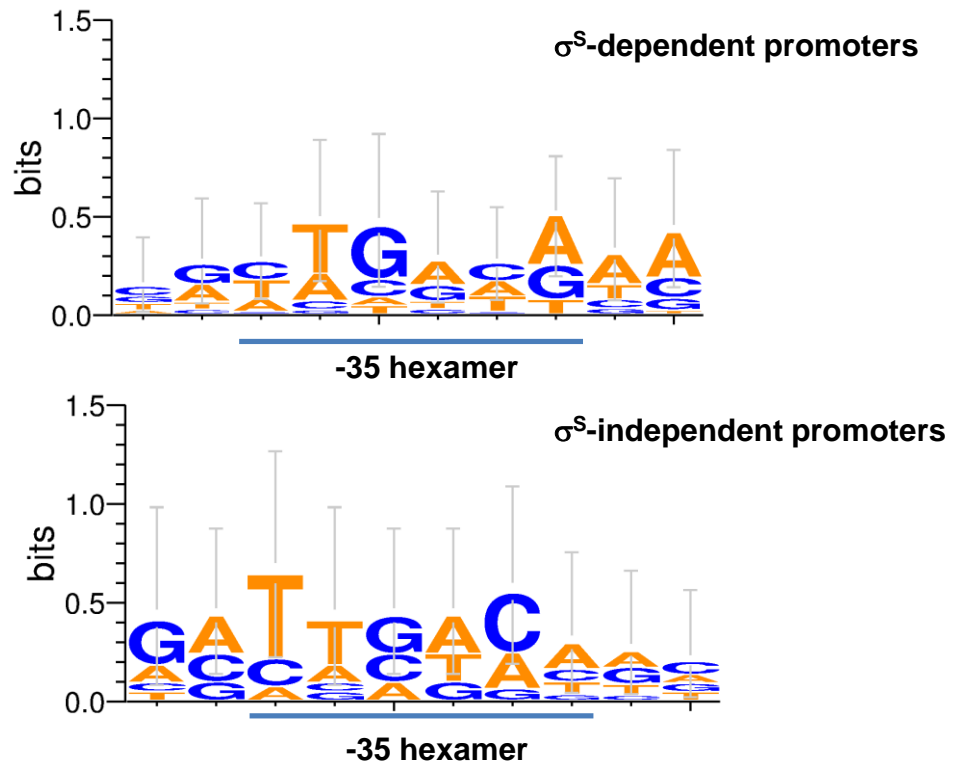

**Supplementary Figure S2. Promoter sequence alignment.** Weblogo 3 (<http://weblogo.threeplusone.com/>) representation of the sequence alignments for experimentally identified promoters located within  $E\sigma^S$  binding sites. -35 regions of either  $\sigma^S$ -dependent (top panel) or  $\sigma^S$ -independent genes (bottom panel) were aligned based on the first nucleotide of the putative -35 hexamer. -35 sequences are reported in Table S4.
